# Supplementary material for: Protected control packets to prevent denial of services attacks in IEEE 802.11 wireless networks
Source: Springer Nature journal article supplement (doi:10.1186/1687-417x-2011-4), 2011-11-28
Supplement: 13635_2010_7_MOESM16_ESM.pdf [file 13635_2010_7_MOESM16_ESM.pdf]

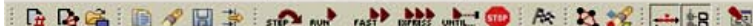

Run #0: Ntez1      Event #19065      T=0.863297970884      Next: Ntez1.wirelessnode2.wlan.mac (id=55)

Msgs scheduled: 5      Msgs created: 15571      Msgs present: 40

Ev/sec: n/a      Simsec/sec: n/a      Ev/simsec: n/a

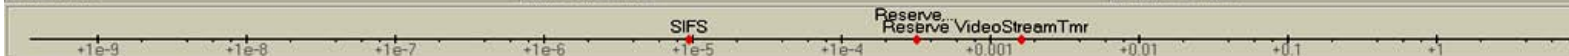

- Ntez1 (Ntez1) (id=...)
- scheduled-even

```

AbstractRadio::handleSelfMsg END
Event #6703 T=0.322253607248 Ntez1.wirelessnode2.wlan.mac (IEEE80211Mac, id=55), on 'wlan-RTS' (IEEE80211RTSFrame, id=5504)
received message from lower layer: (IEEE80211RTSFrame)wlan-RTS
frame->getName() is: wlan-RTS
frame->getType() is: 27
frame->getEvlLength() is: 36
current_clock_time (CCT) is: 0.322278030367
frame received TS is: 0.321941343725
CCT-TS is: 0.000336686642
Timestamp field is fresh. Go to check AF
cchMytimestamp is: 0.321941343725
cchDuration is: 0
cchReceiverAddress is: 69-00-00-00-00-11
Frame->getMytimestamp() is: 0.321941343725
Frame->getDuration() is: 0
Frame->getReceiverAddress() is: 69-00-00-00-00-11
input2sha of the whole frame is: 0.321941343725069-00-00-00-112824e0ec93972a6947d2b095b66dcdedf3d957c0
output digest is: 2D8F5042C092E8798FB1AA42A90A33D0CD1516B5
trim of xored is: 2D8F5042C092E8798FB1AA42
control frame received AF is: 2D8F5042C092E8798FB1AA42
control frame calculated AF is: 2D8F5042C092E8798FB1AA42
AF is matched, control frame is legal->accepted
Self address: 69-00-00-00-00-22, receiver address: 69-00-00-00-00-11, received frame is for us: 0
state information: mode = DCF, state = IDLE, backoff = 0, backoffPeriod = 0, retryCounter = 0, radioState = 0, nav = 0
processing event in state machine IEEE80211Mac State Machine
FSM IEEE80211Mac State Machine: leaving state IDLE
firing Receive transition for IEEE80211Mac State Machine
FSM IEEE80211Mac State Machine: entering state RECEIVE
FSM IEEE80211Mac State Machine: leaving state RECEIVE
firing Immediate-Receive-Other transition for IEEE80211Mac State Machine
FSM IEEE80211Mac State Machine: entering state IDLE
state information: mode = DCF, state = IDLE, backoff = 0, backoffPeriod = 0, retryCounter = 0, radioState = 0, nav = 0
Event #6704 T=0.322253611099 Ntez1.wirelessnode1.wlan.radio (IEEE80211Radio, id=38), on selfmsg 'endRx' (cMessage, id=5501)
AbstractRadio::handleSelfMsg2
frame is completely received now
  
```
