# Supplementary figures and images for: Protected control packets to prevent denial of services attacks in IEEE 802.11 wireless networks
Source: Springer Nature journal article supplement (doi:10.1186/1687-417x-2011-4), 2011-11-28

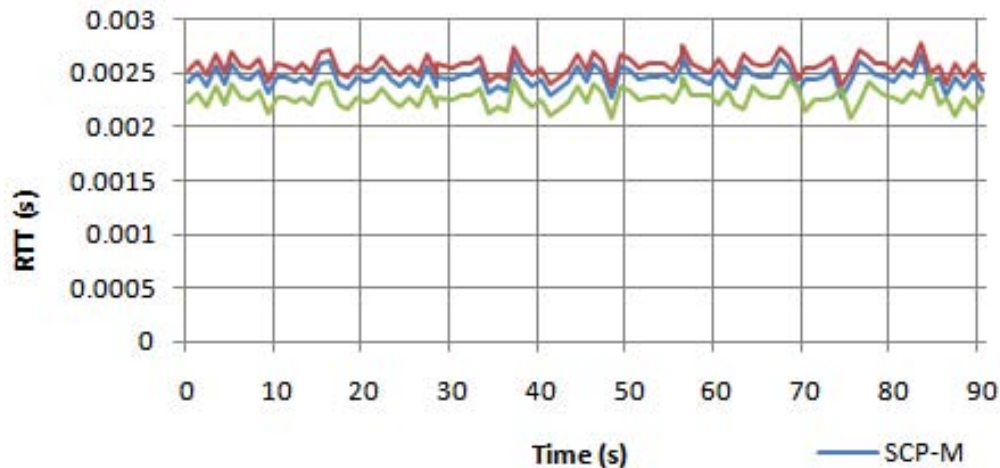

| Model         | 0-30 s   | 30-60 s  | 60-90 s  |
|---------------|----------|----------|----------|
| <b>802.11</b> | 0.002265 | 0.002271 | 0.002273 |
| <b>SCP-M</b>  | 0.002457 | 0.002462 | 0.002465 |
| <b>SCP-O</b>  | 0.002553 | 0.002558 | 0.002561 |

— SCP-M  
 — SCP-O  
 — 802.11

Supplement: 13635_2010_7_MOESM11_ESM.pdf [file 13635_2010_7_MOESM11_ESM.pdf]
